# Supplementary material for: VOCs determination by adsorbent-Raman system in food and botanicals
Source: Royal Society of Chemistry journal article supplement (doi:10.1039/d0ay00180e), 2020-01-01
Supplement: d0ay00180e1.pdf [file d0ay00180e1.pdf]

## Supplementary

### S1 Gas concentration approximation

- a. Maximum limit based on the assumption that the liquid drop was fully evaporated

We can approximate the amount of the vapor due to vapor pressure based on the equation expressed in previous question.

$$n_{VOC} = \frac{P_{VOC}V_{Total}}{RT}$$

From the evaporated amount from 5 $\mu$ l each reagent drops, we can finally approximate the concentration when it will be fully evaporated.

$$C_{VOC,max}[ppmv] = \frac{\frac{P_{VOC}}{P_{atm}} \times 10^6 \times V_{total\ reagent}}{n_{VOC} \times \frac{Molar\ mass}{Density}} = \frac{RT \times 10^6 \times V_{total\ reagent}}{V_{Total} \times \frac{Molar\ mass}{Density}}$$

| VOC                   | Amount (mole)           | Density (g/ml) | Molar mass (g/mol) | $C_{VOC,max}$ [ppmv] |
|-----------------------|-------------------------|----------------|--------------------|----------------------|
| Linalool              | 1.08 X 10 <sup>-6</sup> | 0.86           | 154.25             | 5683                 |
| Cis-3-hexen-1-ol      | 5.89 X 10 <sup>-6</sup> | 0.846          | 100.159            | 8610                 |
| Cis-3-hexenyl-acetate | 7.85 X 10 <sup>-6</sup> | 0.897          | 142.198            | 6430                 |
| Methyl salicylate     | 2.2 X 10 <sup>-7</sup>  | 1.174          | 152.149            | 7865                 |

**Table S 1. Maximum concentration limit for each VOC**

- b. Approximation of mixture concentration

$$Concentration = Volume\ percent\ ratio \times Density_{Mixture} \times 10^6 \left( \frac{mg}{L} = \frac{\mu g}{ml} \right)$$

$$Density_{Mixture} = \frac{Density_{Linalool} + Density_{Cis-3-hexen-1-ol} + Density_{Methyl\ salicylate}}{3}$$

|                               | Average GC/MS peak area |            | Recovery (%) |
|-------------------------------|-------------------------|------------|--------------|
|                               | Standard                | VOC eluate |              |
| Linalool                      | 90285570                | 87460823   | 97           |
| <i>cis</i> -3-Hexen-1-ol      | 65759826                | 56046591   | 85           |
| <i>cis</i> -3-Hexenyl acetate | 67767688                | 66787699   | 98           |
| Methyl salicylate             | 61623426                | 22858992   | 37           |

**Table S 2. Recovery rate comparison according to the tested VOCs**

| Wavenumber<br>(cm <sup>-1</sup> ) | LI vs. MIX | HA vs. MIX | HO vs. MIX | MS vs. MIX |
|-----------------------------------|------------|------------|------------|------------|
| 808                               | 0.84       | 0.83       | 0.83       | 0.60       |
| 812                               | 0.86       | 0.85       | 0.83       | 0.70       |
| 1032                              | 0.95       | 0.94       | 0.93       | 0.79       |
| 1040                              | 0.86       | 0.78       | 0.79       | 0.74       |
| 1644                              | 0.77       | 0.88       | 0.85       | 0.83       |
| 1652                              | 0.81       | 0.82       | 0.73       | 0.82       |
| 1656                              | 0.86       | 0.86       | 0.88       | 0.86       |
| 1672                              | 0.45       | 0.88       | 0.86       | 0.83       |

**Table S 3. Loading matrix of PC 1 for the case study (VOC vs. Mixture)**

| PC number | Eigenvalue | Percent (%) | Cumulative percentage (%) |
|-----------|------------|-------------|---------------------------|
| 1         | 2.9477     | 42.110      | 42.110                    |
| 2         | 1.4194     | 20.276      | 62.386                    |
| 3         | 0.9911     | 14.159      | 76.545                    |
| 4         | 0.8430     | 12.043      | 88.588                    |
| 5         | 0.3864     | 5.520       | 94.108                    |
| 6         | 0.2646     | 3.780       | 97.888                    |
| 7         | 0.1479     | 2.112       | 100.000                   |

**Table S 4. Cumulative percentage of PC of mixture for PCR**

| Wavenumber<br>( $\text{cm}^{-1}$ ) | PC 1   | PC 2    |
|------------------------------------|--------|---------|
| 808                                | 0.8244 | 0.2459  |
| 812                                | 0.9086 | 0.1640  |
| 1032                               | 0.8879 | -0.1987 |
| 1644                               | 0.2518 | 0.8721  |
| 1656                               | 0.5740 | -0.5649 |
| 1676                               | 0.3075 | 0.2685  |
| 1680                               | 0.4085 | -0.3750 |

**Table S 5. Loading matrix of PC 1 and PC 2 of mixture for PCR**

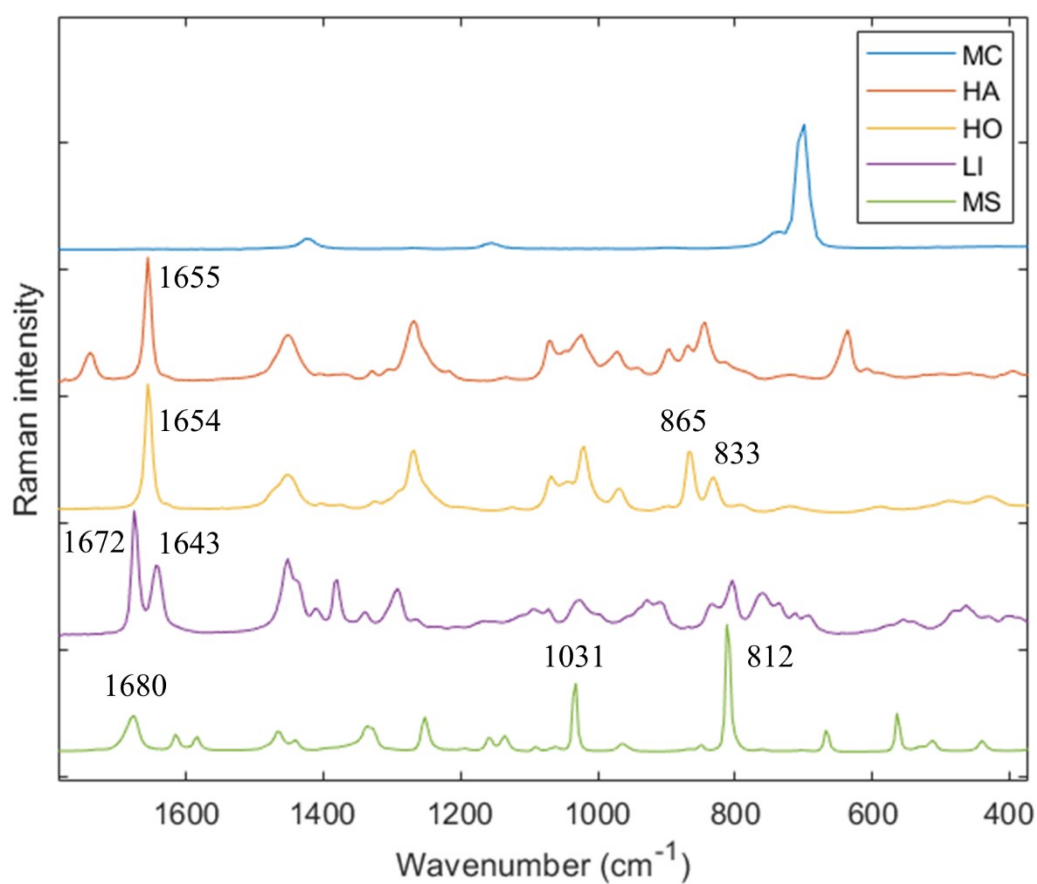

**Figure S 1. Raman spectra for four standards**

(MC: dichloromethane, HA: cis-3-hexenyl acetate, HO: cis-3-hexen-1-ol, LI: linalool, MS: methyl salicylate)

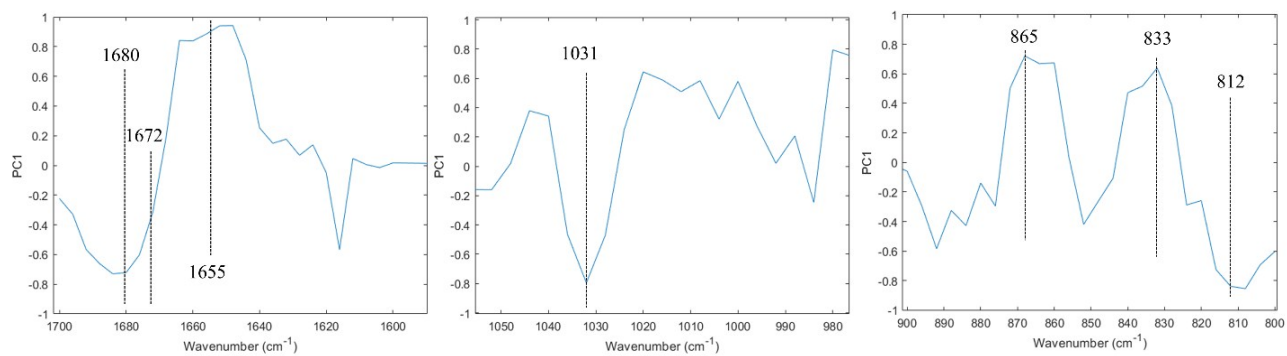

**Figure S 2. Plot of PC 1 versus identified wavenumbers**

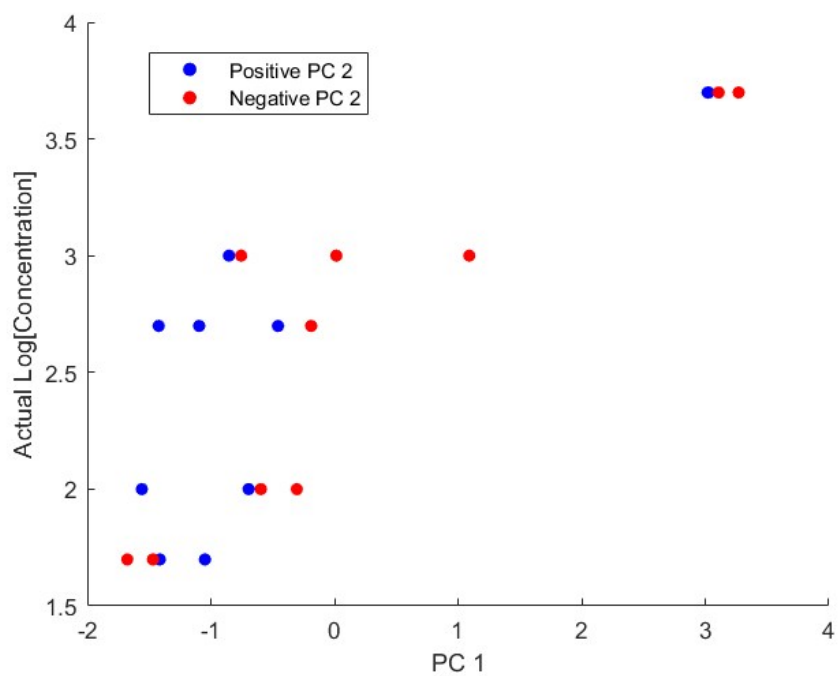

**Figure S 3. Plot of PC 1 versus concentration according to the sign of PC 2**
